# Supplementary material for: Interannual variability of summertime formaldehyde (HCHO) vertical column density and its main drivers at northern high latitudes
Source: Copernicus journal article supplement (doi:10.5194/acp-24-6105-2024), 2024-05-28
Supplement: Supplementary file 1 [file acp-24-6105-2024-supplement.pdf]

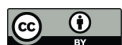

*Supplement of*

## **Interannual variability of summertime formaldehyde (HCHO) vertical column density and its main drivers at northern high latitudes**

**Tianlang Zhao et al.**

*Correspondence to:* Tianlang Zhao (tzhao@alaska.edu) and Jingqiu Mao (jmao2@alaska.edu)

The copyright of individual parts of the supplement might differ from the article licence.

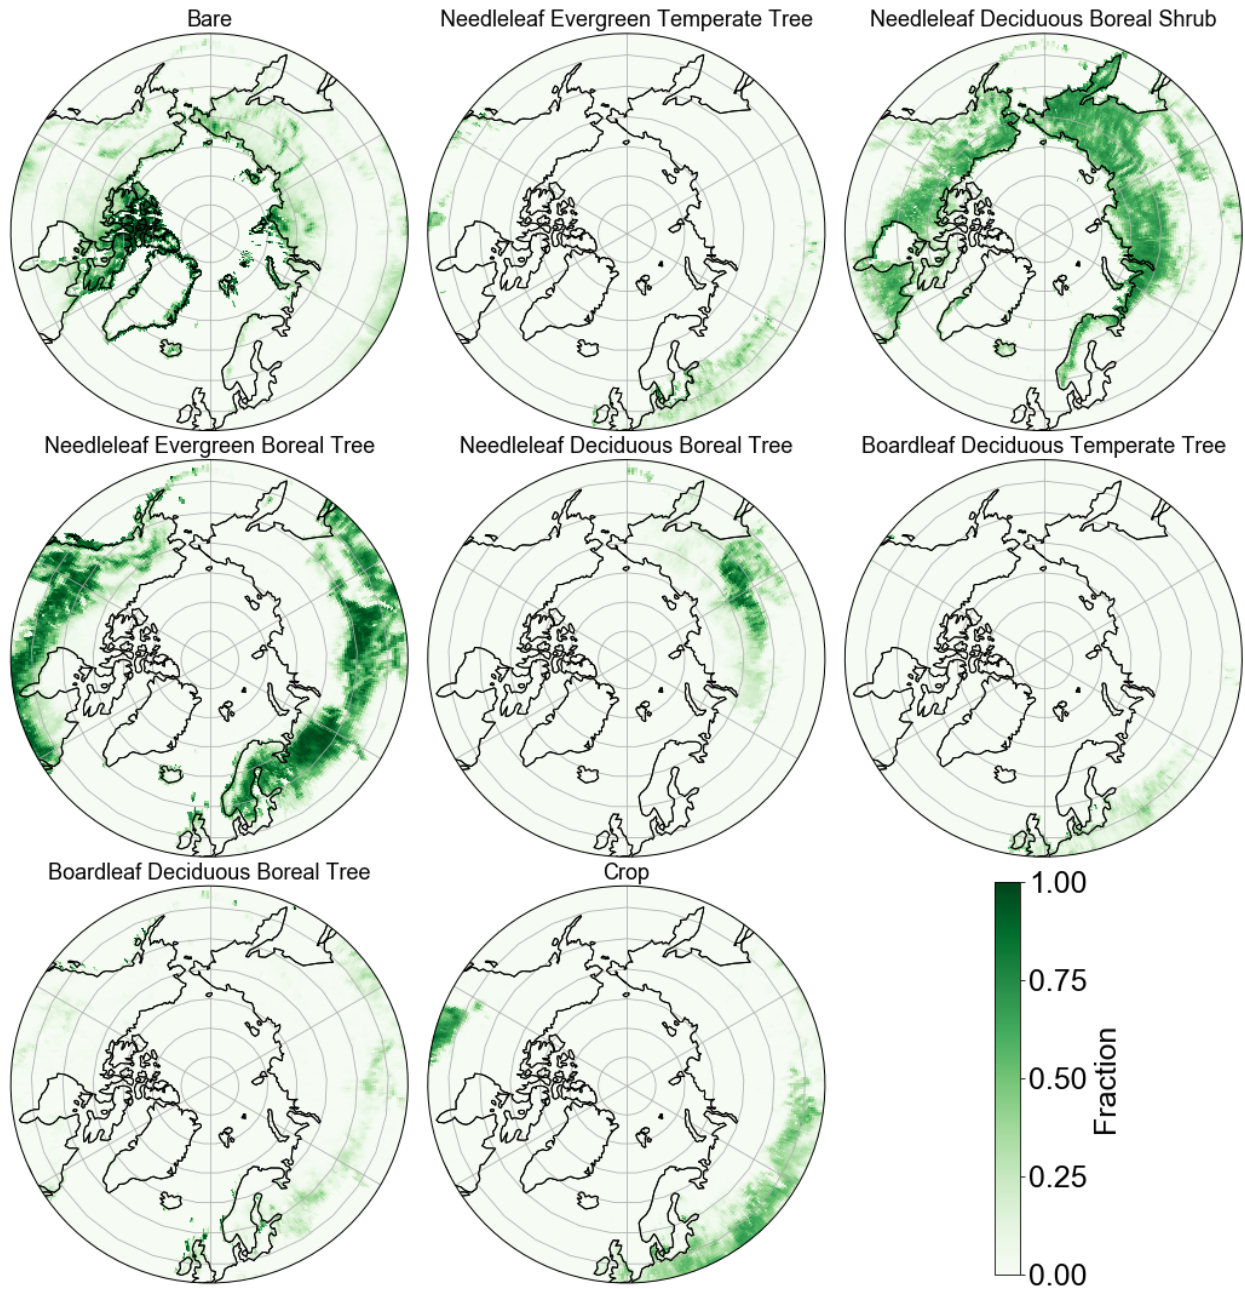

**Figure S1. Fraction of major plant functional types (PFTs) over northern high latitudes. The PFT distribution is from CLM4 model for the year 2000, with a horizontal resolution of**

5  $0.25^{\circ} \times 0.3125^{\circ}$ .

**Table S1. Definition of high HCHO VCD years in four study regions, based on reprocessed OMI HCHO VCD in 2005-2019 summers.**

| Region          | High HCHO years                    |
|-----------------|------------------------------------|
| Eastern Europe  | 2006 2007 2010 2013 2014 2018      |
| Siberia         | 2006 2011 2012 2013 2014 2018 2019 |
| Northern Canada | 2010 2013 2014 2015 2017 2018      |
| Alaska          | 2005 2009 2013 2015 2017 2019      |

5

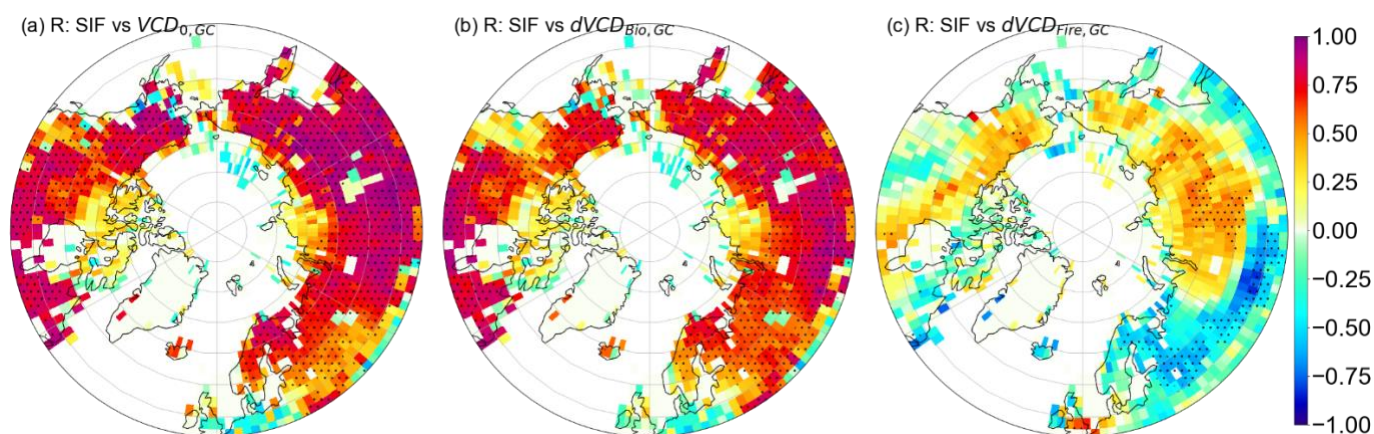

**Figure S2 | Pearson linear correlation between OCO-2 SIF and GEOS-Chem dVCDs in northern high latitudes, in summers from 2015 to 2019. (a) SIF vs  $dVCD_{Bio,GC}$ . (b) SIF vs  $dVCD_{Fire,GC}$ . Dotted area has  $p < 0.05$  in a significance t-test.**

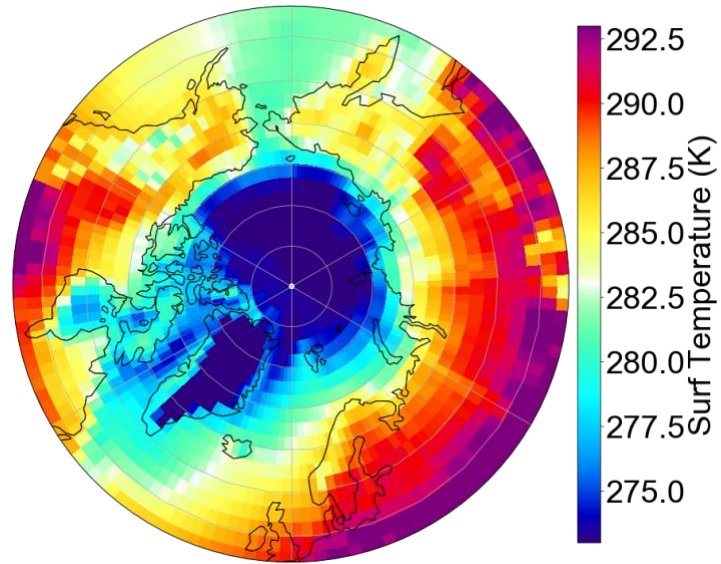

*Figure S3. Monthly mean surface air temperature in northern high latitudes, Julys of 2012-2019.*
